# Supplementary material for: Cytokine-Mediated Inflammation in the Oral Cavity and Its Effect on Lipid Nanocarriers
Source: MDPI journal article supplement (doi:10.3390/nano11051330), 2021-05-18
Supplement: s1 [file s1]

## Supplementary Material

# Cytokine-Mediated Inflammation in the Oral Cavity and Its Effect on Lipid Nanocarriers

Carolin Tetyczka <sup>1</sup>, Sonja Hartl <sup>1</sup>, Ramona Jeitler <sup>1</sup>, Markus Absenger-Novak <sup>2</sup>, Claudia Meindl <sup>2</sup>, Eleonore Fröhlich <sup>2</sup>, Sabrina Riedl <sup>3</sup>, Dagmar Zweytick <sup>3</sup> and Eva Roblegg <sup>1,\*</sup>

<sup>1</sup> Institute of Pharmaceutical Sciences, Department of Pharmaceutical Technology and Biopharmacy, University of Graz, 8010 Graz, Austria; carolin.tetyczka@uni-graz.at (C.T.); sonja.hartl@uni-graz.at (S.H.); ramona.jeitler@uni-graz.at (R.J.)

<sup>2</sup> Center for Medical Research, Medical University of Graz, 8010 Graz, Austria; markus.absenger@medunigraz.at (M.A.-N.); claudia.meindl@medunigraz.at (C.M.); eleonore.froehlich@medunigraz.at (E.F.)

<sup>3</sup> Institute of Molecular Biosciences, Biophysics Division, University of Graz, 8010 Graz, Austria; sabrina.riedl@uni-graz.at (S.R.); dagmar.zweytick@uni-graz.at (D.Z.)

\* Correspondence: eva.roblegg@uni-graz.at; Tel.: +43-(0)-316-380-8888

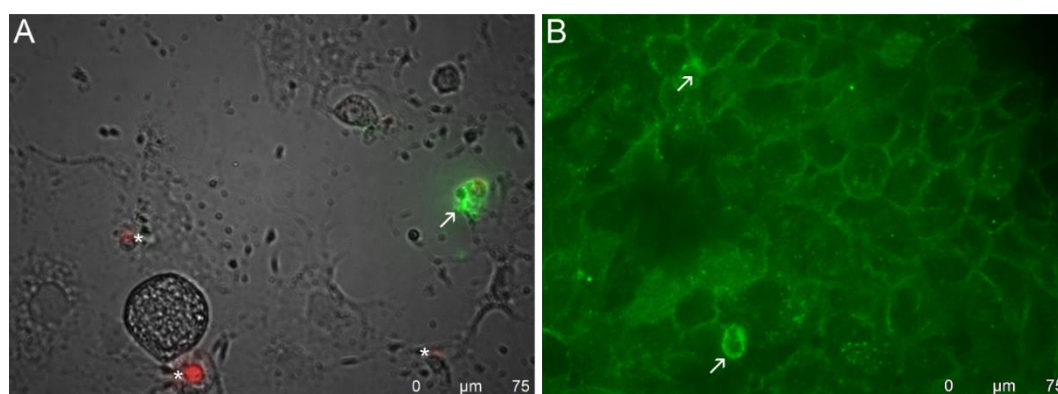

**Figure S1.** Fluorescence microscopic images (overlay of bright field and fluorescence channels) of TR146 cells treated with 800 ng/mL IL-1 $\beta$  (A) and 400 ng/mL TNF- $\alpha$  (B). Arrows indicate specific binding of Annexin V-Alexa Fluor 488 (green) to PS on the outside of the cells. Stars show representative PI stained necrotic cells (red).

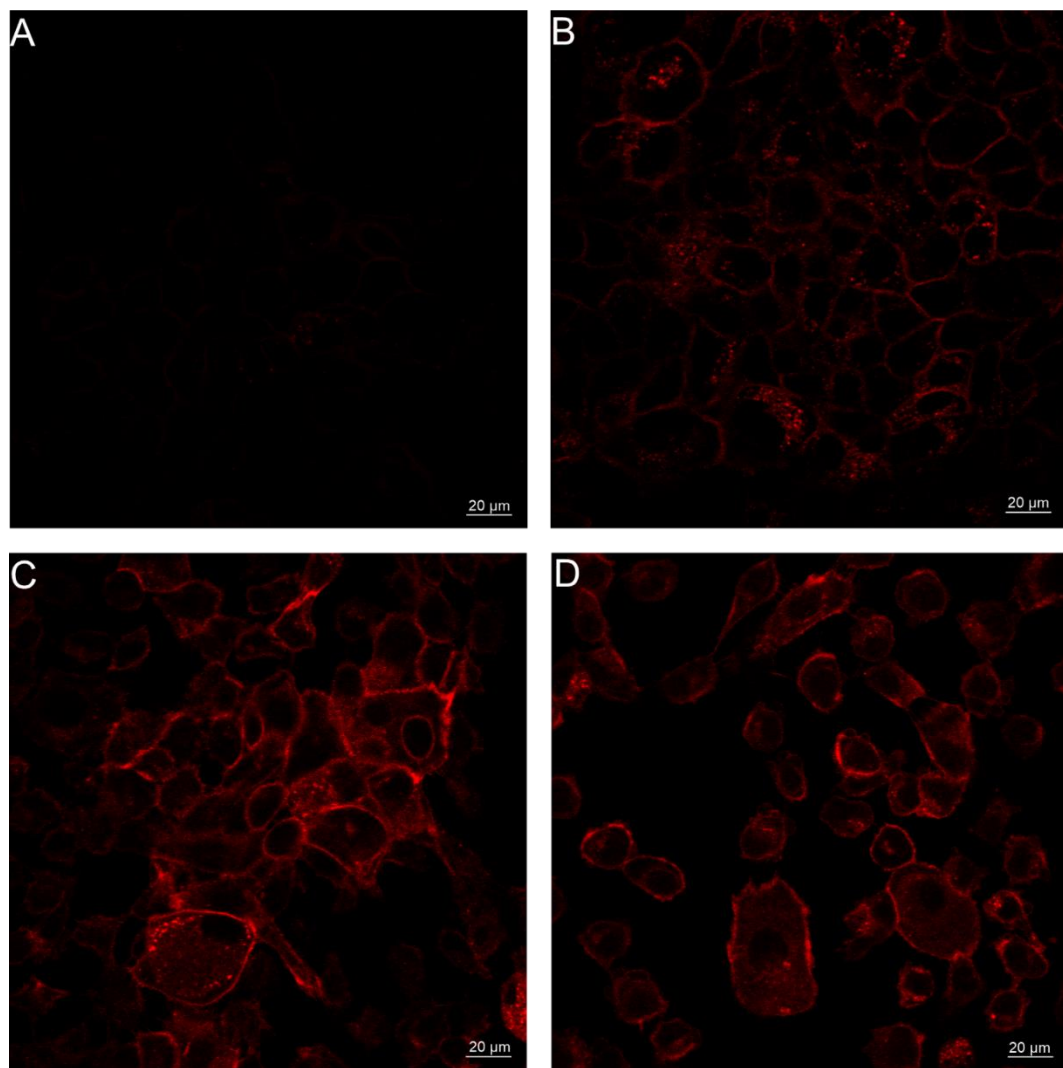

**Figure S2.** Fluorescence microscopic images of untreated TR146 cells (**A**) and TR146 cells treated with ETDA (**B**), 400 ng/mL IL-1 $\beta$  (**C**) and 300 ng/mL TNF- $\alpha$  (**D**). Desmosomes (red) were stained with anti-Desmoglein 3 antibody and binding visualized with a secondary antibody conjugated to Alexa Fluor 568.
